# Supplementary material for: Mechanical phenotyping of primary human skeletal stem cells in heterogeneous populations by real-time deformability cytometry
Source: Royal Society of Chemistry journal article supplement (doi:10.1039/c5ib00304k), 2016-01-01
Supplement: c5ib00304k1.pdf [file c5ib00304k1.pdf]

## Supplementary Material

### Supplementary Figure 1

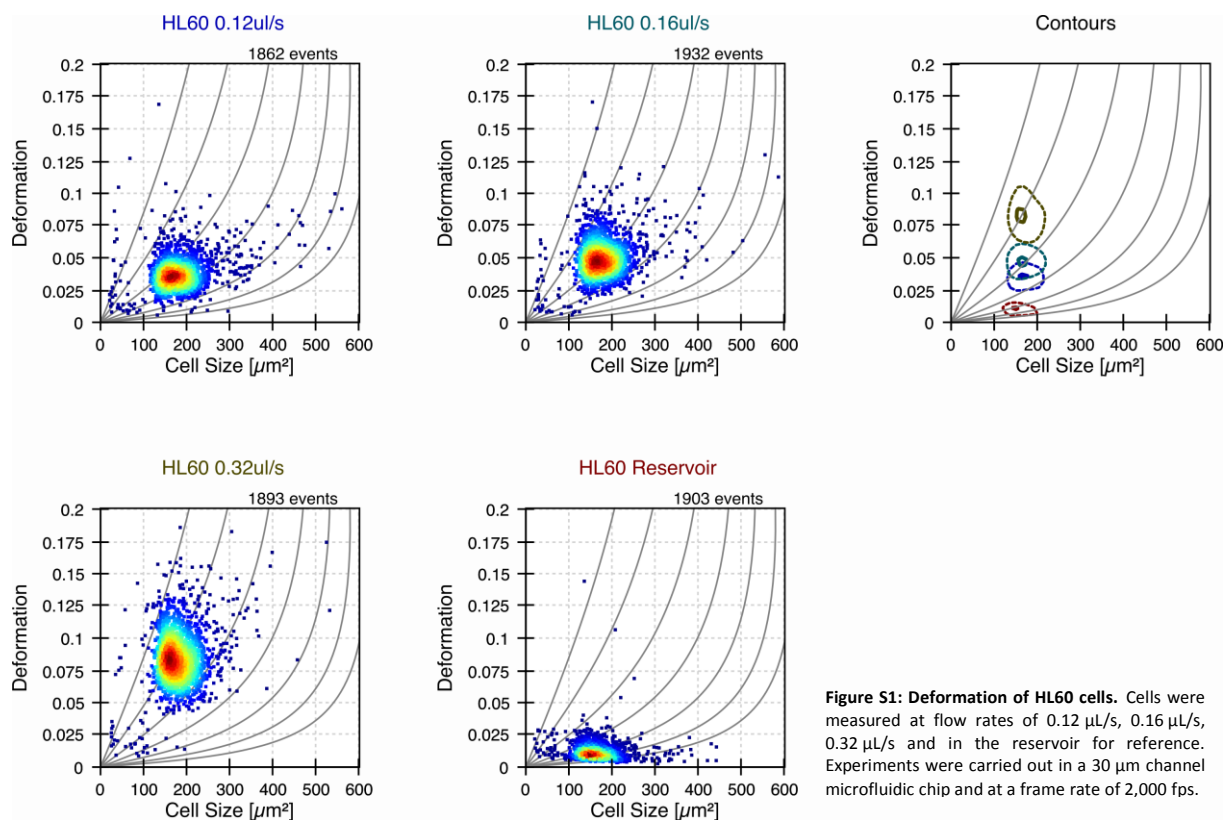

**Figure S1: Deformation of HL60 cells.** Cells were measured at flow rates of 0.12  $\mu\text{L/s}$ , 0.16  $\mu\text{L/s}$ , 0.32  $\mu\text{L/s}$  and in the reservoir for reference. Experiments were carried out in a 30  $\mu\text{m}$  channel microfluidic chip and at a frame rate of 2,000 fps.

### Supplementary Figure 2

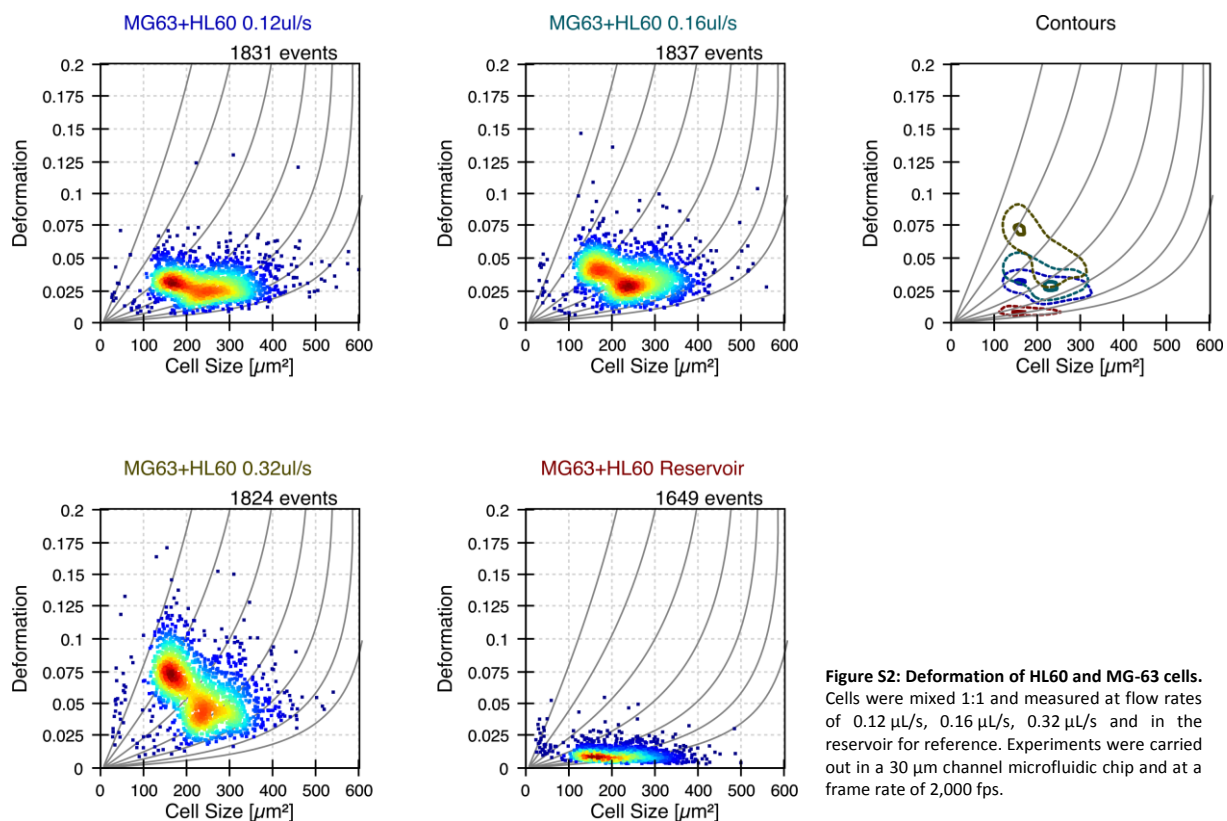

**Figure S2: Deformation of HL60 and MG-63 cells.** Cells were mixed 1:1 and measured at flow rates of 0.12  $\mu\text{L/s}$ , 0.16  $\mu\text{L/s}$ , 0.32  $\mu\text{L/s}$  and in the reservoir for reference. Experiments were carried out in a 30  $\mu\text{m}$  channel microfluidic chip and at a frame rate of 2,000 fps.

### Supplementary Figure 3

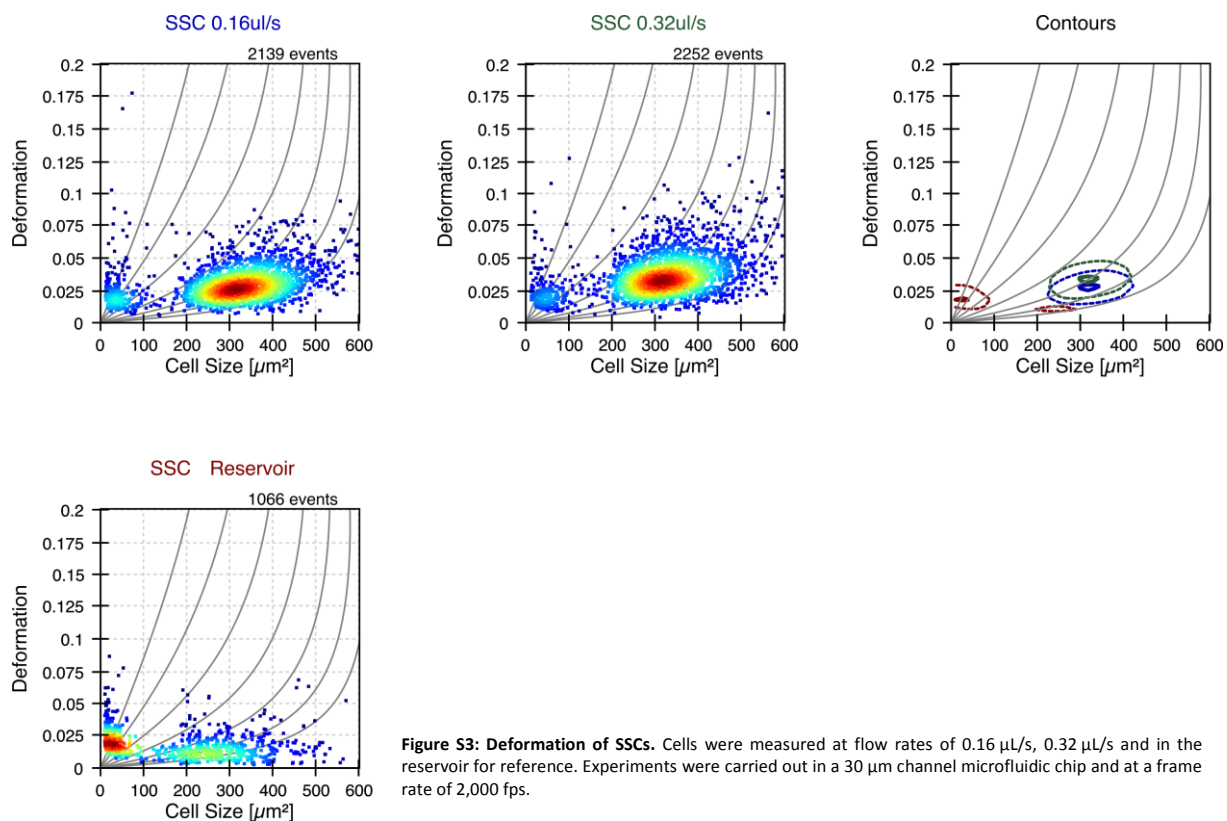

**Figure S3: Deformation of SSCs.** Cells were measured at flow rates of 0.16  $\mu\text{L/s}$ , 0.32  $\mu\text{L/s}$  and in the reservoir for reference. Experiments were carried out in a 30  $\mu\text{m}$  channel microfluidic chip and at a frame rate of 2,000 fps.

### Supplementary Figure 4

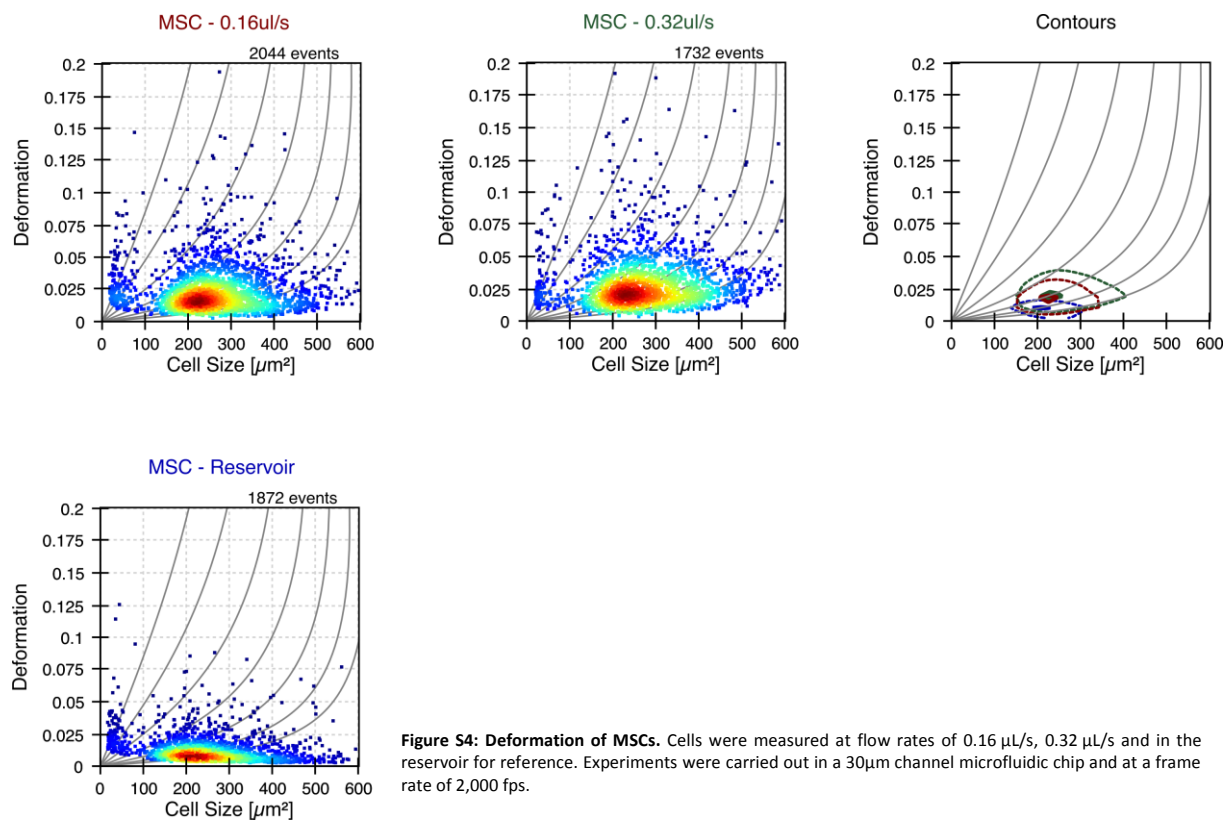

**Figure S4: Deformation of MSCs.** Cells were measured at flow rates of 0.16  $\mu\text{L/s}$ , 0.32  $\mu\text{L/s}$  and in the reservoir for reference. Experiments were carried out in a 30  $\mu\text{m}$  channel microfluidic chip and at a frame rate of 2,000 fps.

## Supplementary Figure 5

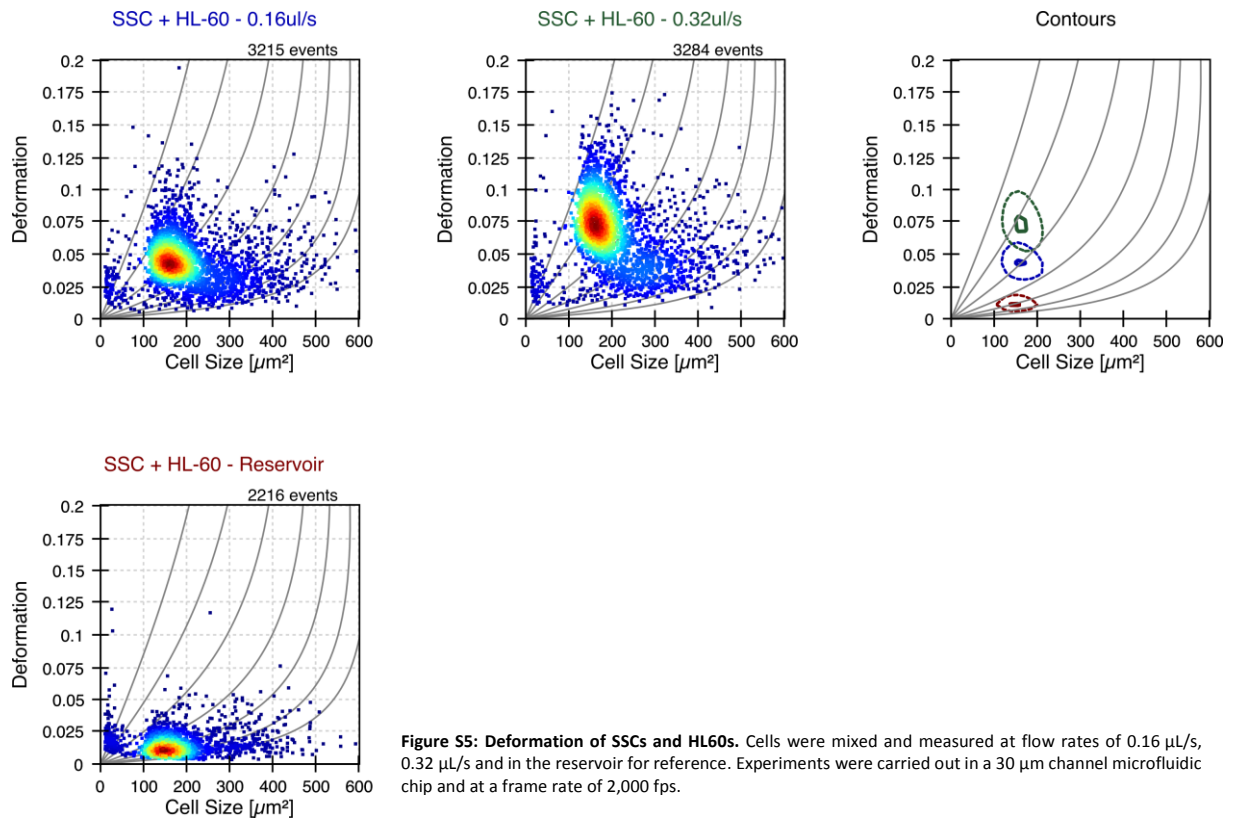

**Figure S5: Deformation of SSCs and HL60s.** Cells were mixed and measured at flow rates of 0.16  $\mu\text{L/s}$ , 0.32  $\mu\text{L/s}$  and in the reservoir for reference. Experiments were carried out in a 30  $\mu\text{m}$  channel microfluidic chip and at a frame rate of 2,000 fps.

## Supplementary Figure 6

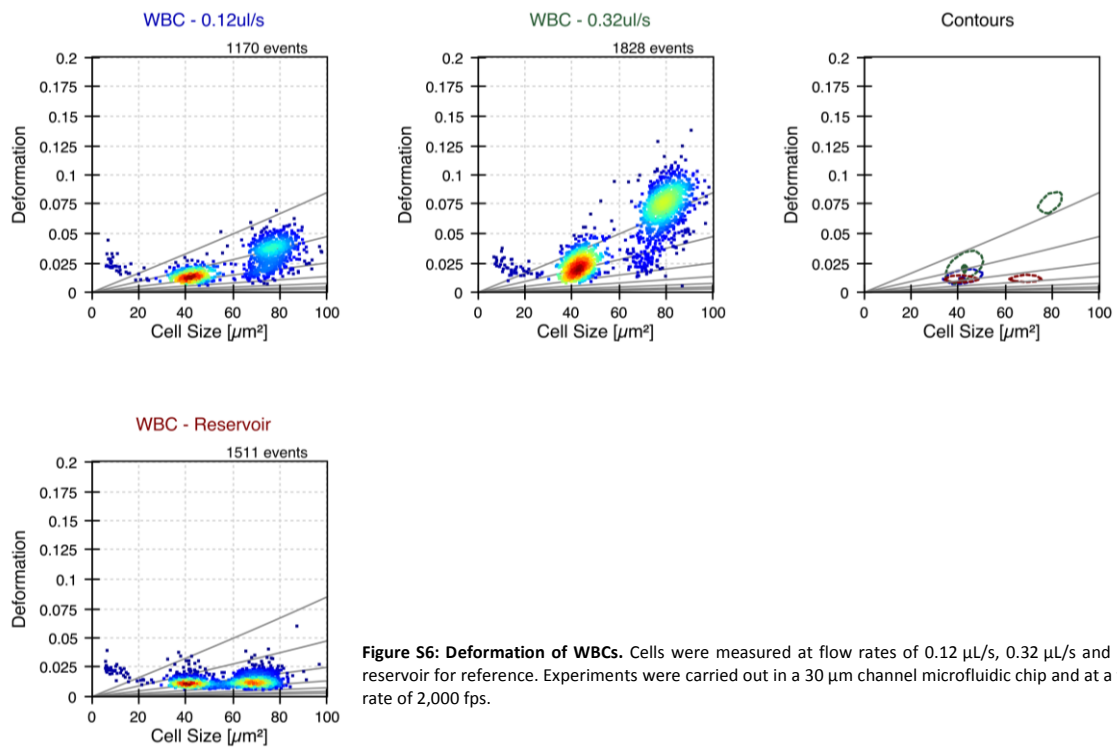

**Figure S6: Deformation of WBCs.** Cells were measured at flow rates of 0.12  $\mu\text{L/s}$ , 0.32  $\mu\text{L/s}$  and in the reservoir for reference. Experiments were carried out in a 30  $\mu\text{m}$  channel microfluidic chip and at a frame rate of 2,000 fps.

## Supplementary Figure 7

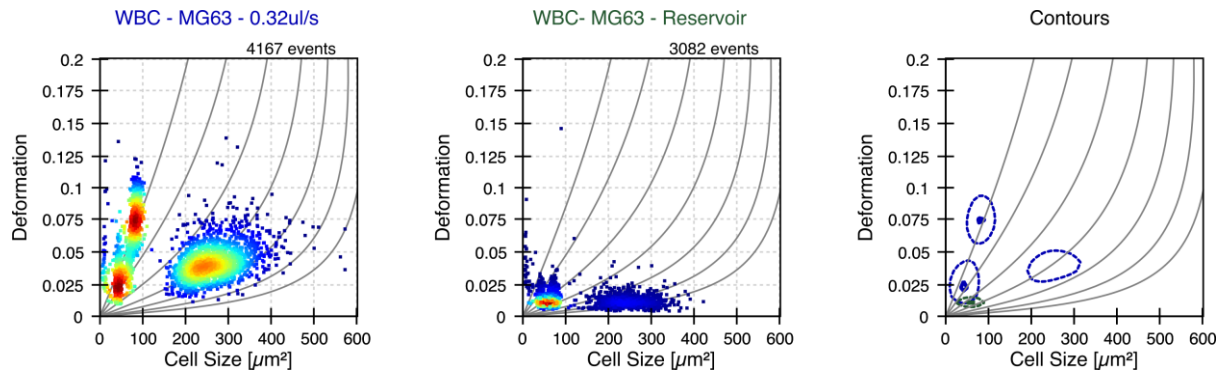

**Figure S7: Deformation of WBCs and MG-63.** Cells were measured at flow rates of 0.32  $\mu\text{L/s}$  and in the reservoir for reference. Experiments were carried out in a 30  $\mu\text{m}$  channel microfluidic chip and at a frame rate of 2,000 fps.

## Supplementary Figure 8

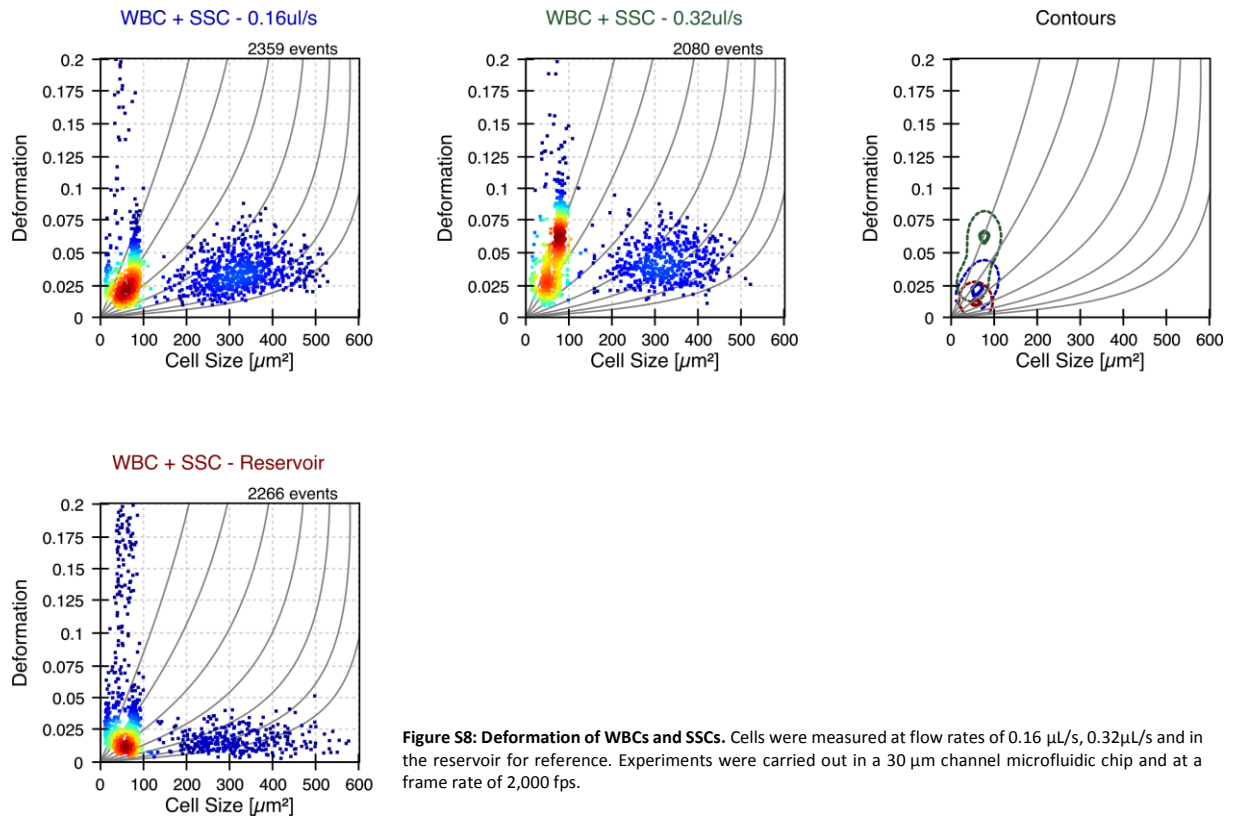

**Figure S8: Deformation of WBCs and SSCs.** Cells were measured at flow rates of 0.16  $\mu\text{L/s}$ , 0.32  $\mu\text{L/s}$  and in the reservoir for reference. Experiments were carried out in a 30  $\mu\text{m}$  channel microfluidic chip and at a frame rate of 2,000 fps.
